# Supplementary material
Source: MDPI journal article supplement (https://www.mdpi.com/1424-8247/16/11/1539)
Supplement: s1 [file s1]

## Supplementary materials

**Table S1.** Ligands used in validation protocol with Kd value and scoring functions from 3 programs. Kd are expressed as PubChem Standard Value (PubChem AID 624919).

| Structure                                                                          | Symbol         | Kd   | Total<br>Score<br>Surflex | Binding<br>Energy<br>AutoDock | XP<br>Score<br>Glide |
|------------------------------------------------------------------------------------|----------------|------|---------------------------|-------------------------------|----------------------|
| 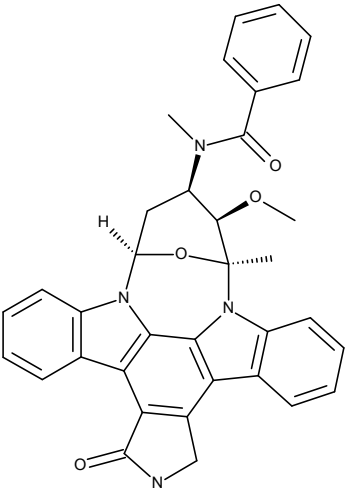  | CHEBI<br>63452 | 0.12 | 7.19                      | -10.91                        | -10.12               |
|  | CHEBI<br>64310 | 0.26 | 6.76                      | -10.47                        | -9.39                |

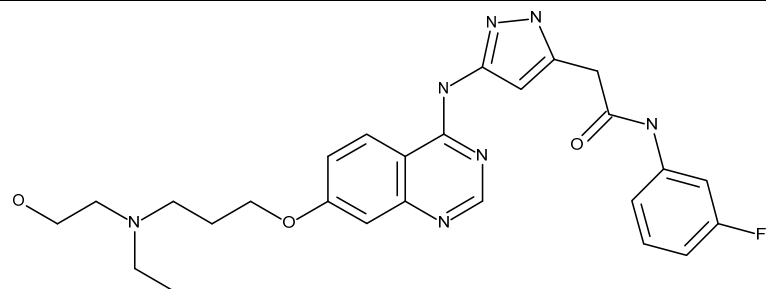

AZD  
1152

0.4

7.36

-8.58

-8.99

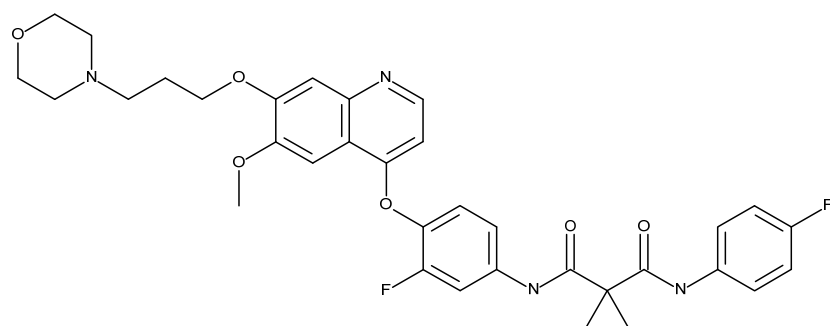

EXEL  
2880

0.44

6.60

-9.41

-4.65

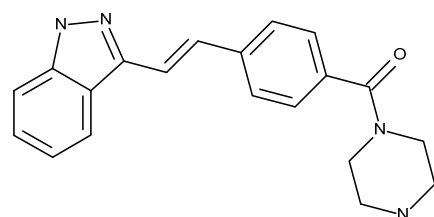

KW  
2449

0.65

6.57

-9.55

-8.81

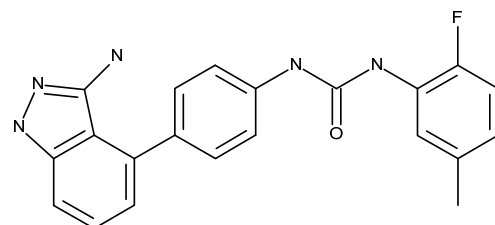

A741  
439

1.6

6.25

-9.65

-8.73

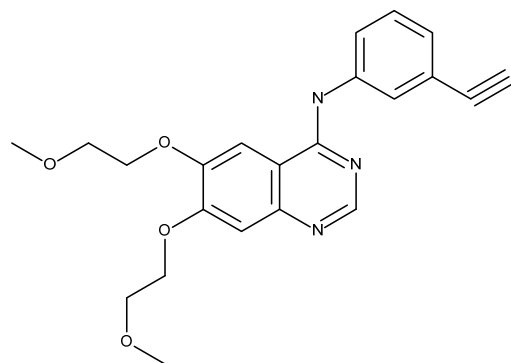

CHEBI  
114785

2.2

7.50

-7.45

-8.56

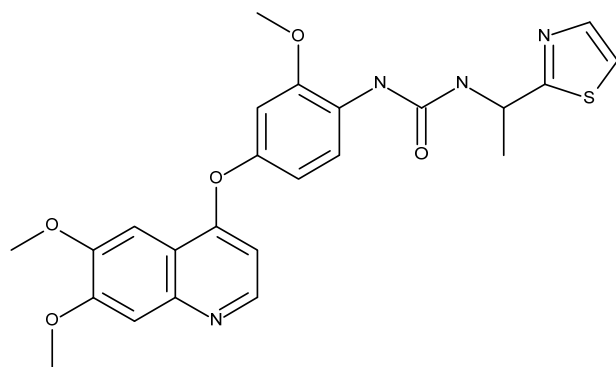

KI  
20227

2.3

5.77

-9.57

-9.44

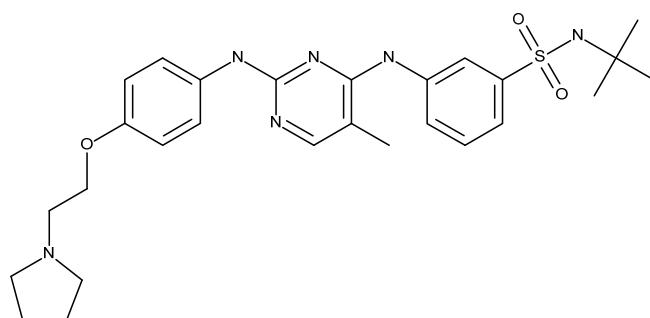

Fedratinib

4.4

6.93

-8.09

-6.73

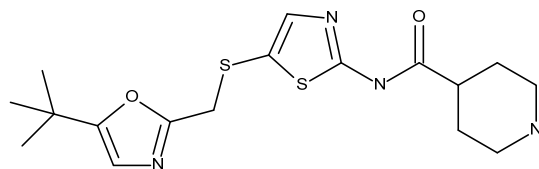

BMS  
387032

7.4

5.36

-7.19

-7.70

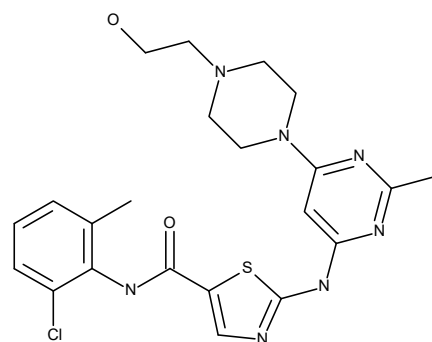

CHEBI  
49375

9.3

5.20

-8.1

-7.58

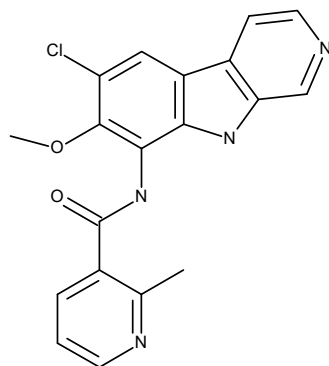

ML  
120

>10

2.89

-8.4

-5.71

**Table S2.** Docking Total Score values for the best poses of selected ligands using Surflex to TRPV1.

| No | TRPV1 Total Score |
|----|-------------------|
| 1  | 5.023             |
| 2  | 4.872             |
| 3  | 5.830             |
| 4  | 4.250             |
| 5  | 5.284             |
| 6  | 4.886             |
| 7  | 4.760             |
| 8  | 3.944             |
| 9  | 5.500             |
| 10 | 4.824             |
| 11 | 4.867             |
| 12 | 5.694             |
| 13 | 4.195             |
| 14 | 4.966             |
| 15 | 5.513             |
| 16 | 3.642             |

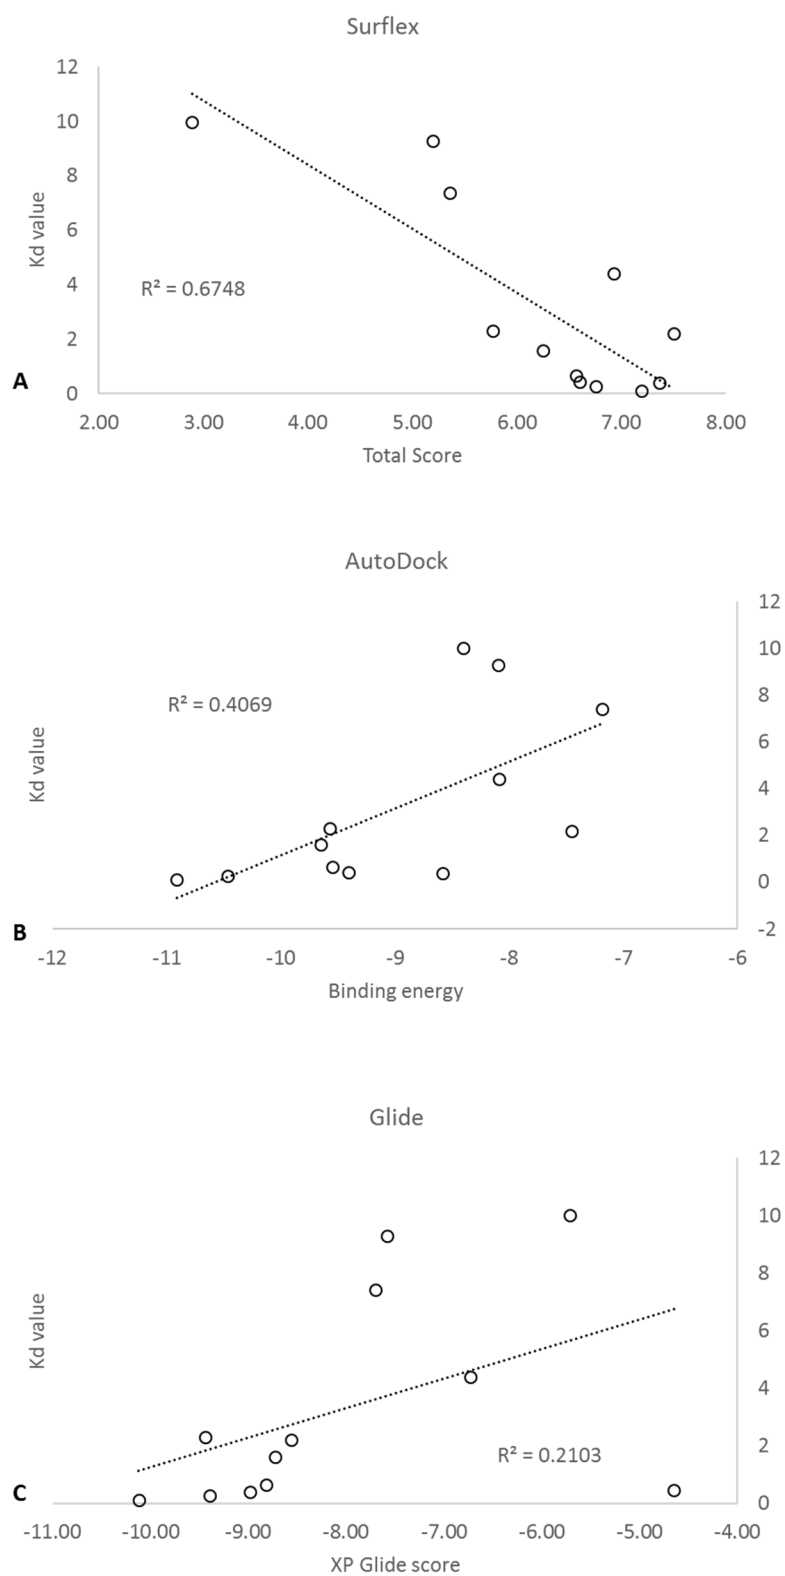

**Figure S1.** Linear regressions between Kd values and docking scores from 3 programs (A. Surflex, B. AutoDock, C. Glide), R<sup>2</sup> – coefficients of determination (A.0.67, B. 0.41, C. 0.21).

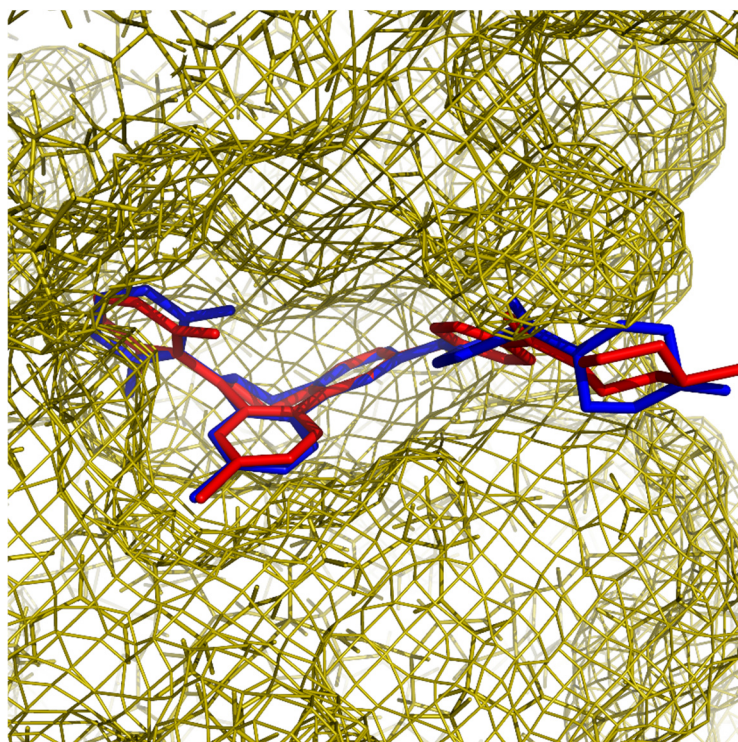

**Figure S2.** Comparison of the conformation of the inhibitor from the 3H10 crystal structure (blue) and this compound docked to Aurka (red) in the active site of the tested protein.

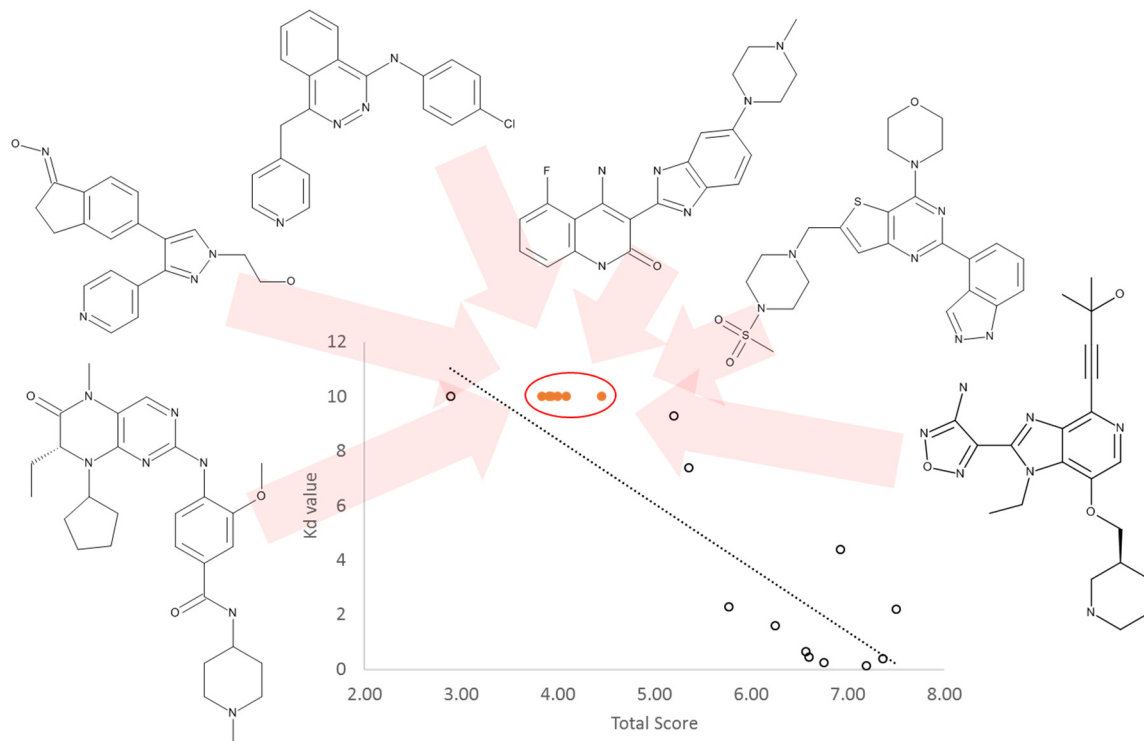

**Figure S3.** Results of docking of compounds with lower affinity ( $K_d > 10$  PubChem 624919) to Aurka.

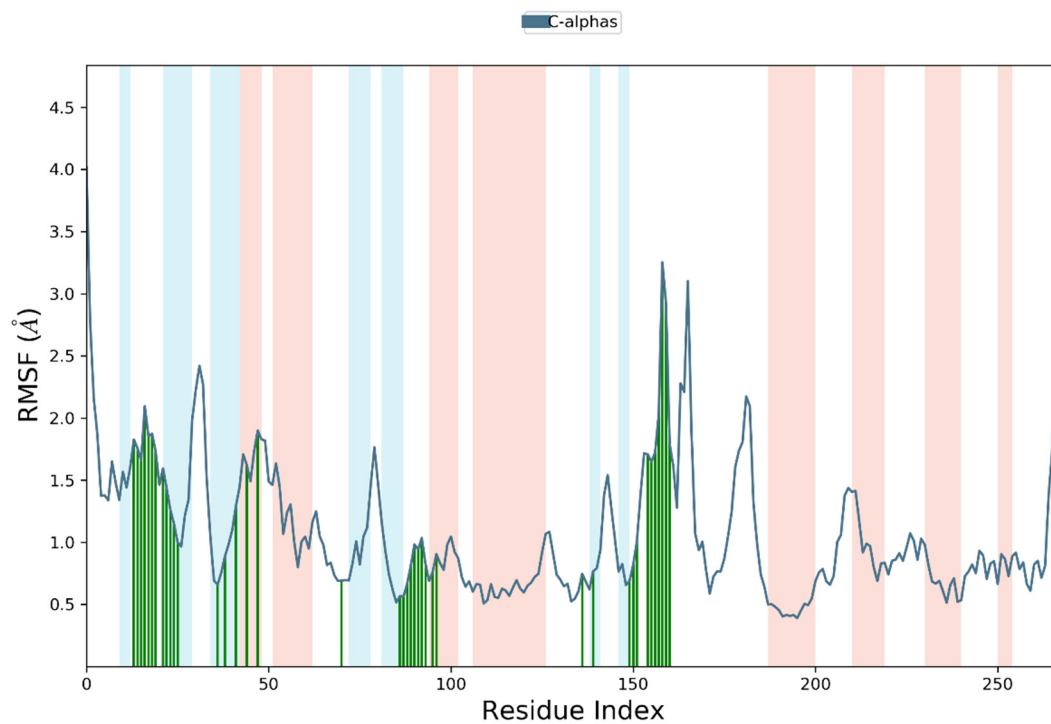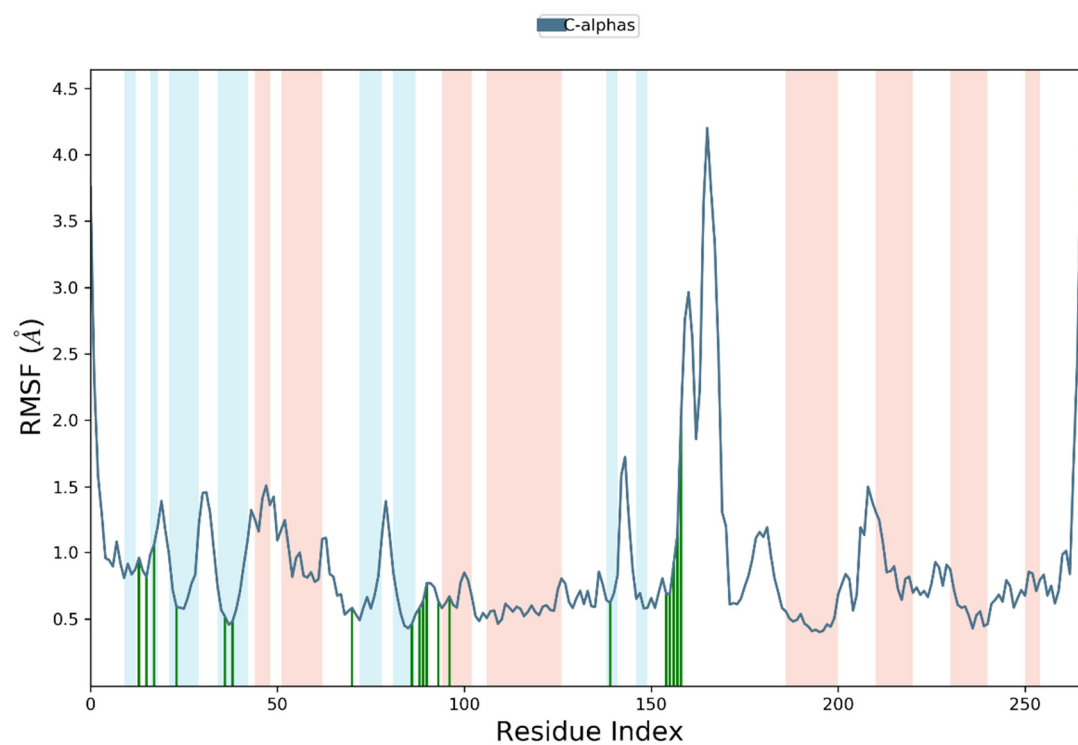



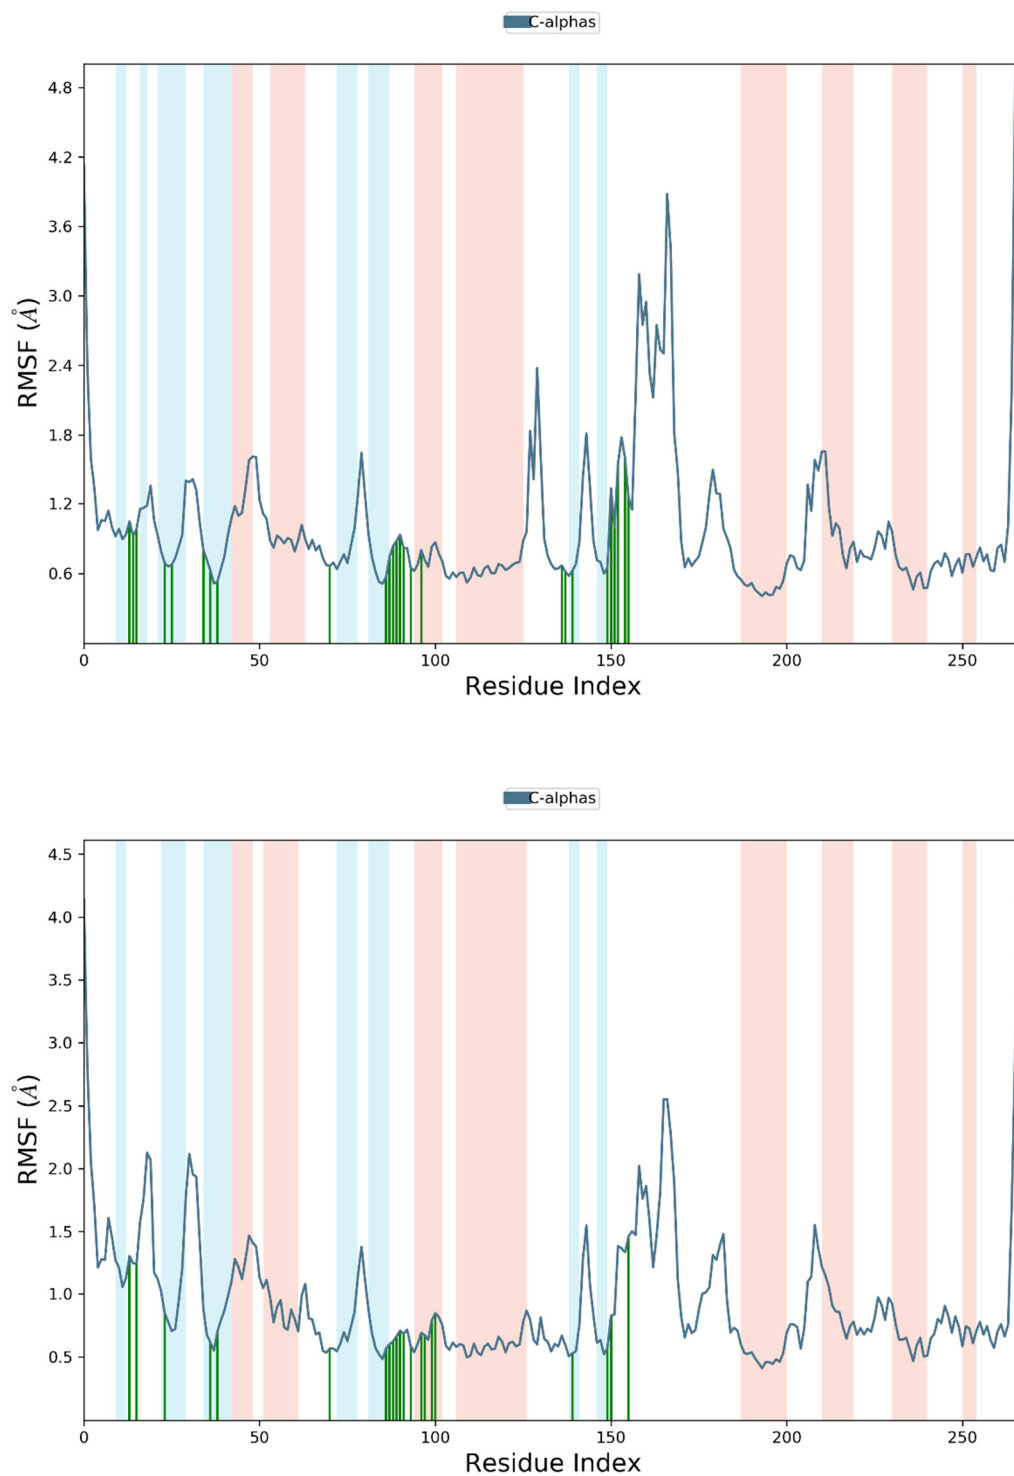

**Figure S4.** RMSF plot obtained for C $\alpha$ -atoms of Aurka in the complexes formed between ligands and Aurka during 100 ns MD simulation. The secondary structure elements: strand (blue) and helix (orange). Green lines indicate the residues that form ligand-protein interactions. The subsequent figures present the complexes in the order: 1 (top), 2, 3, AZD1152 (bottom).

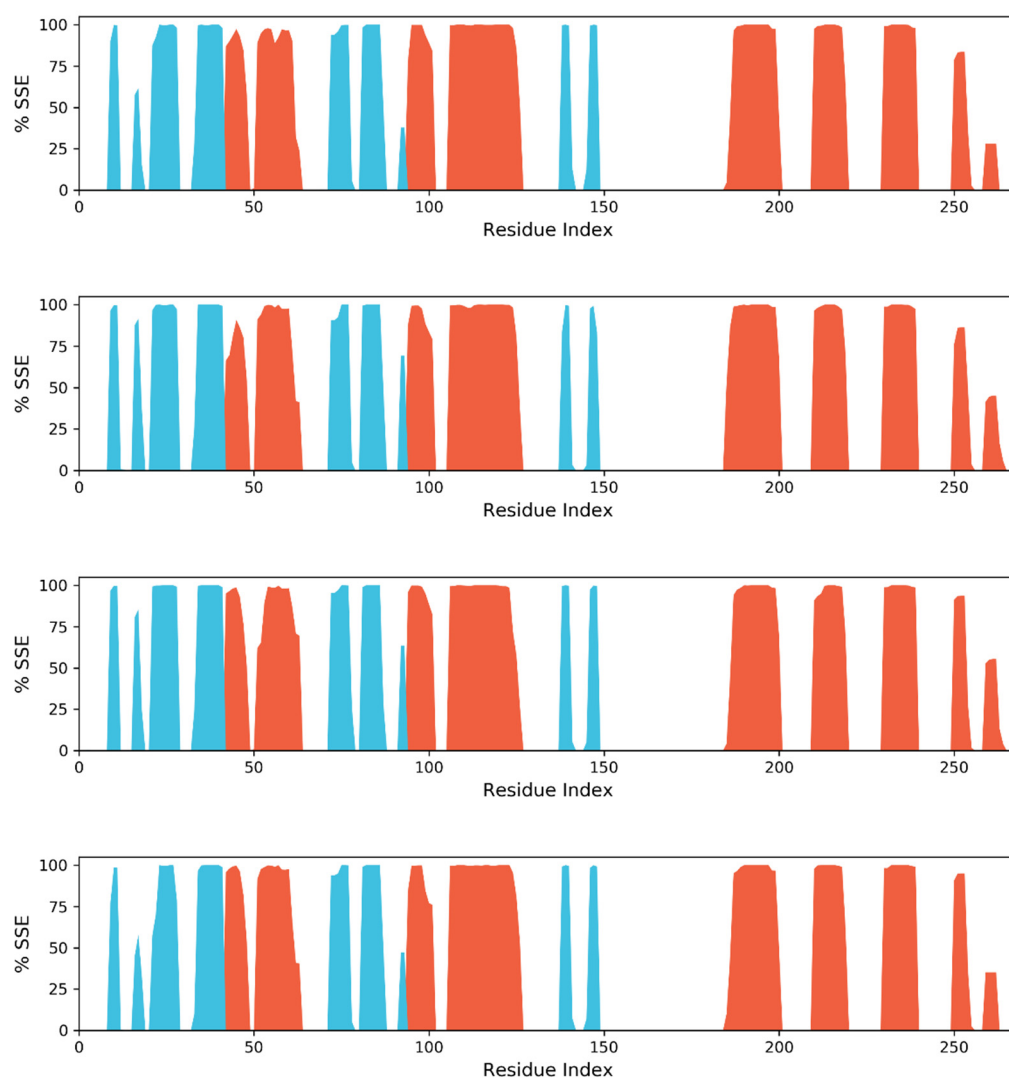

**Figure S5.** Secondary structure content (SSE, %) of the Aurka as a function of residue number. The secondary structure elements: strand (blue) and helix (orange). The subsequent figures present the complexes in the order: 1 (top), 2, 3, AZD1152 (bottom).

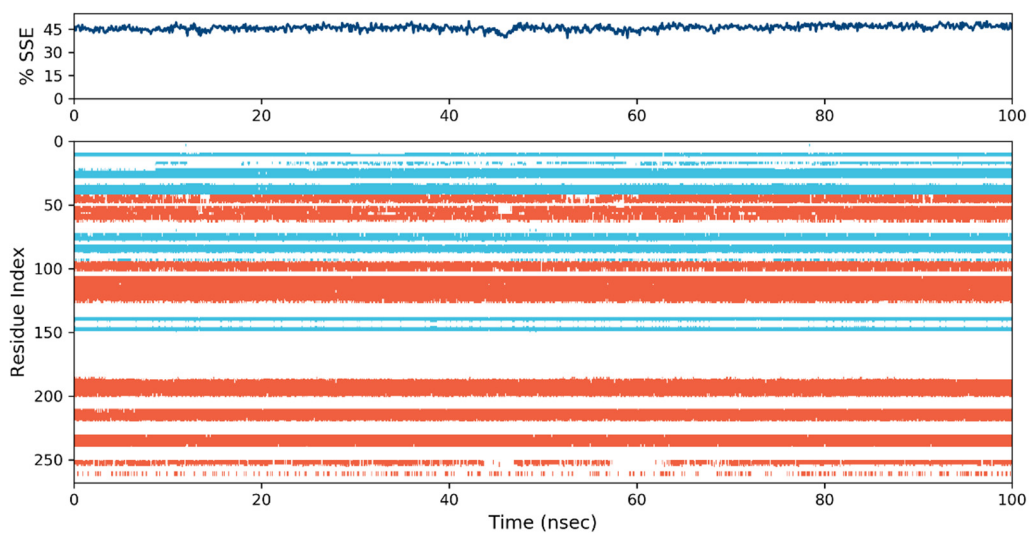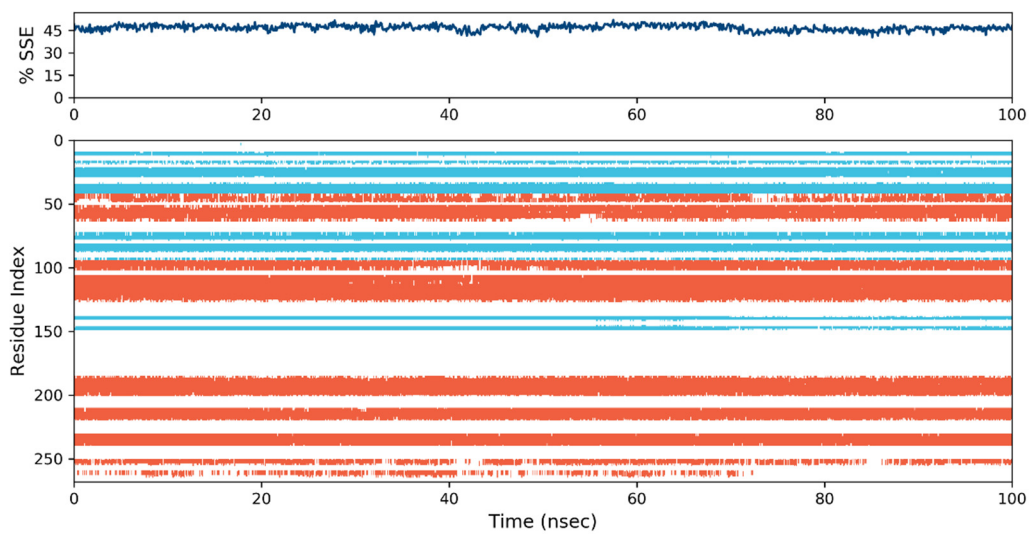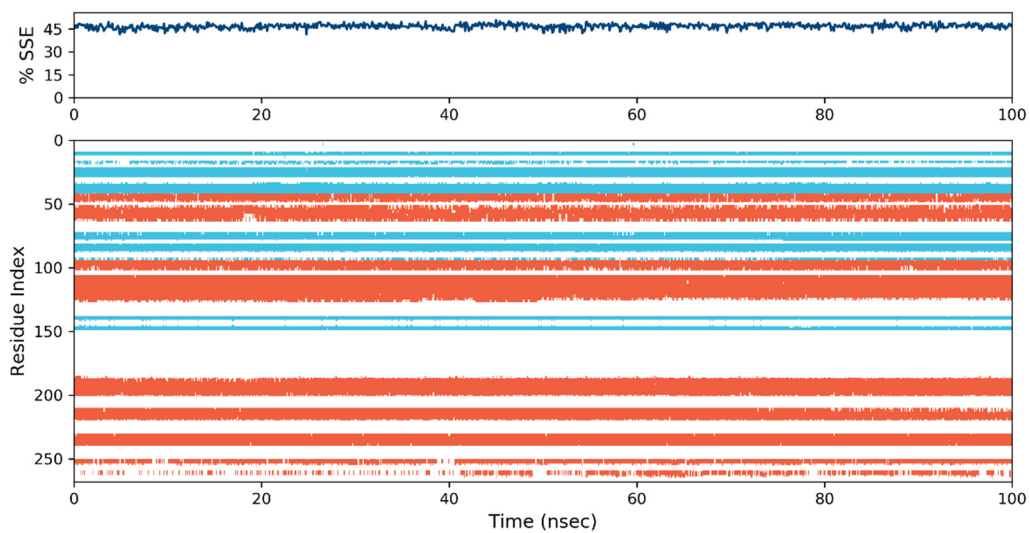

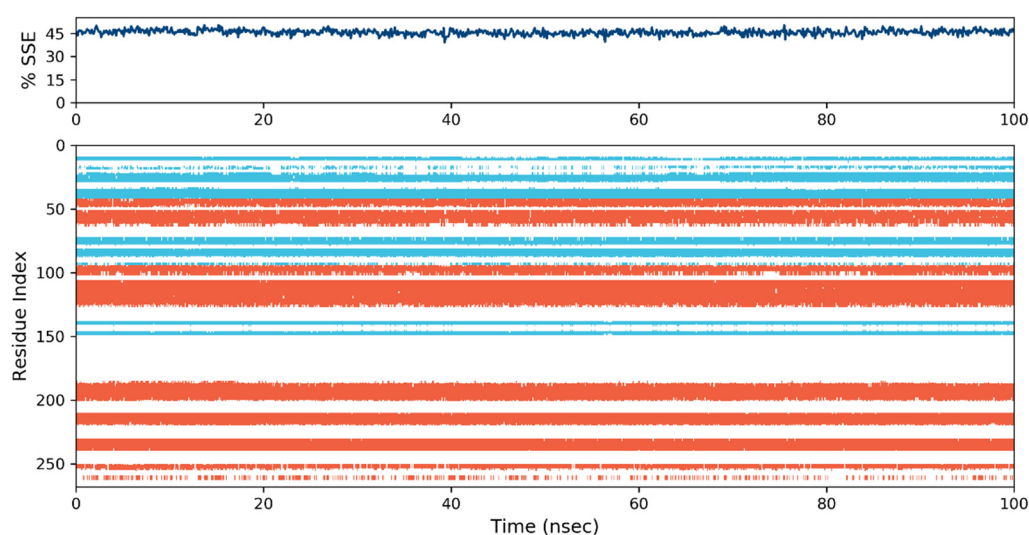

**Figure S6.** The secondary structure content of Aurka as a function of time. The upper plot shows the secondary structure content as a function of time as the total helix+strand and the lower plot presents the secondary structure content as a function of time of residue index. The subsequent figures present the complexes in the order: 1 (top), 2, 3, AZD1152 (bottom).

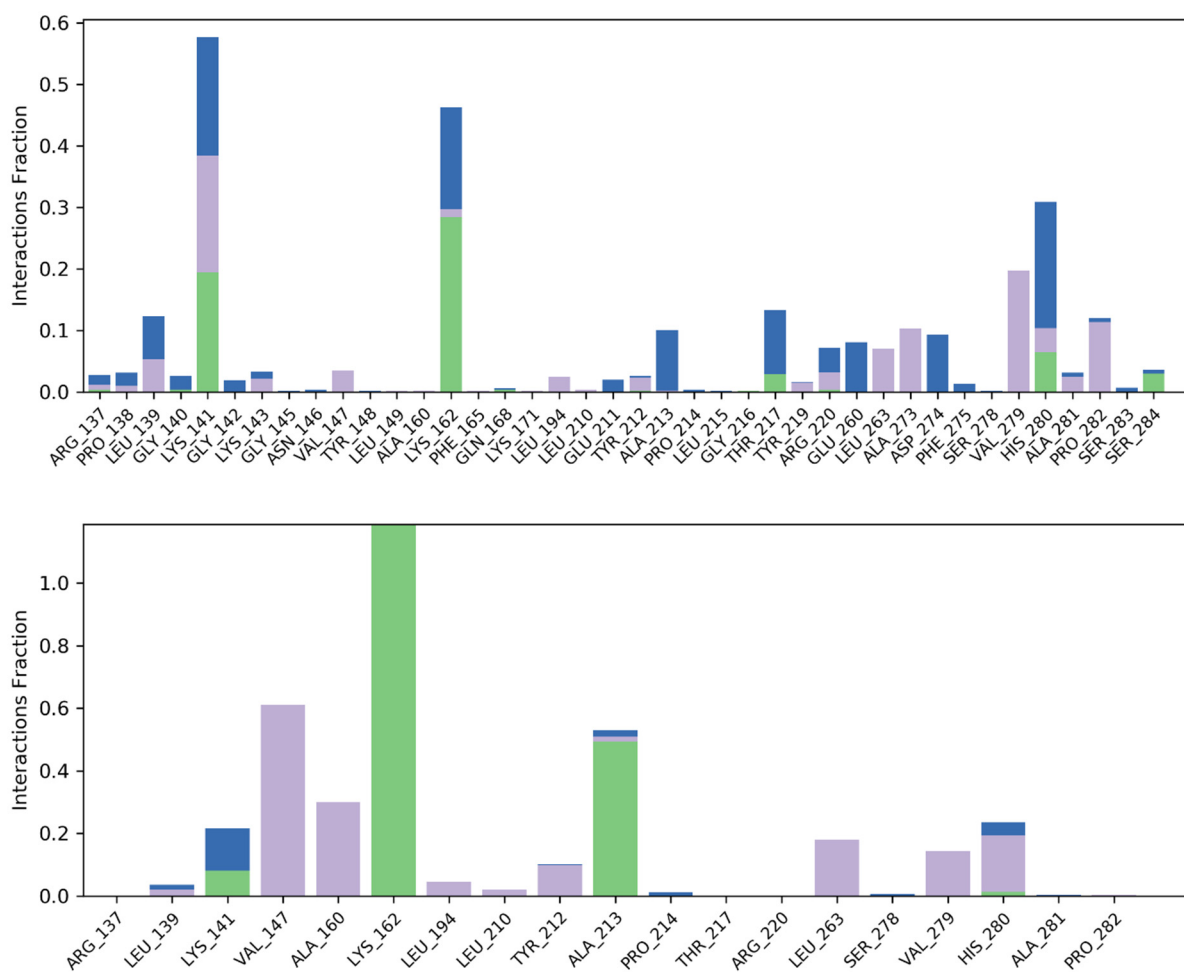

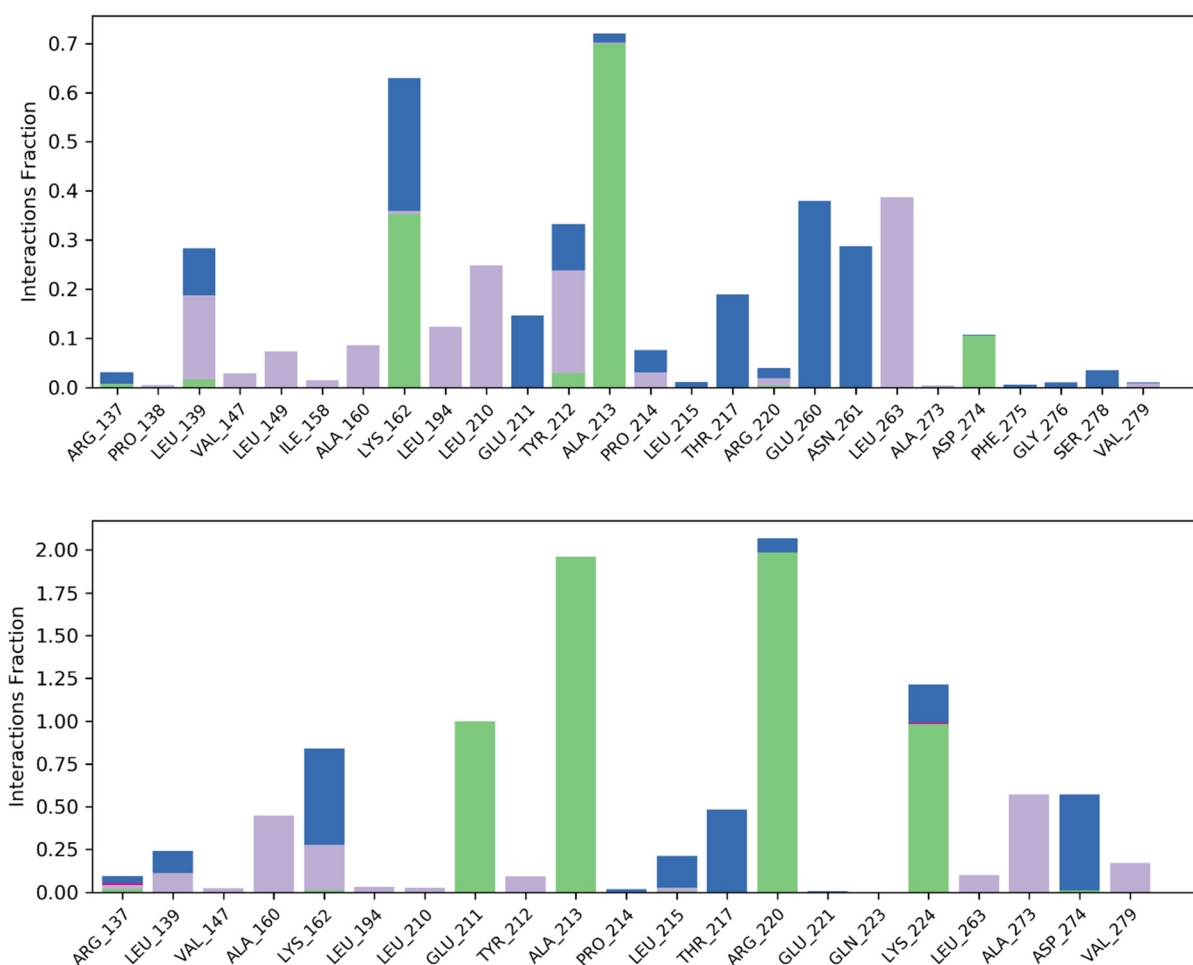

**Figure S7.** Protein-ligand contacts chart showing fraction of the simulation time during the studied ligands were in contact with Aurka residues. Blue color represents the interactions that involve hydrogen bonding via a water bridge molecule. The geometric criteria are a H-A distance less than 2.7Å, a D-H-A angle greater than 110°, and a H-A-X angle greater than 80° for the hydrogen bonds to the bridging water. Green color shows hydrogen bonds, defined by distances and angles of the D-H...A-X atom arrangement: a H-A distance less than 2.8Å, a D-H-A angle greater than 120°, and a H-A-X angle greater than 90°. Purple color indicates hydrophobic interactions, broken down into three types: pi-pi stacking—two aromatic groups stacked face-to-face, with distance between centroids less than 4.4Å and angle between planes less than 30°, or face-to-edge, with distance between centroids less than 5.5Å and angle between planes greater than 60°; pi-cation—aromatic and charged group centroids within 4.5Å, and general—hydrophobic side chain within 3.6Å of ligand aromatic or aliphatic carbon. The subsequent figures present the complexes in the order: 1 (top), 2, 3, AZD1152 (bottom).

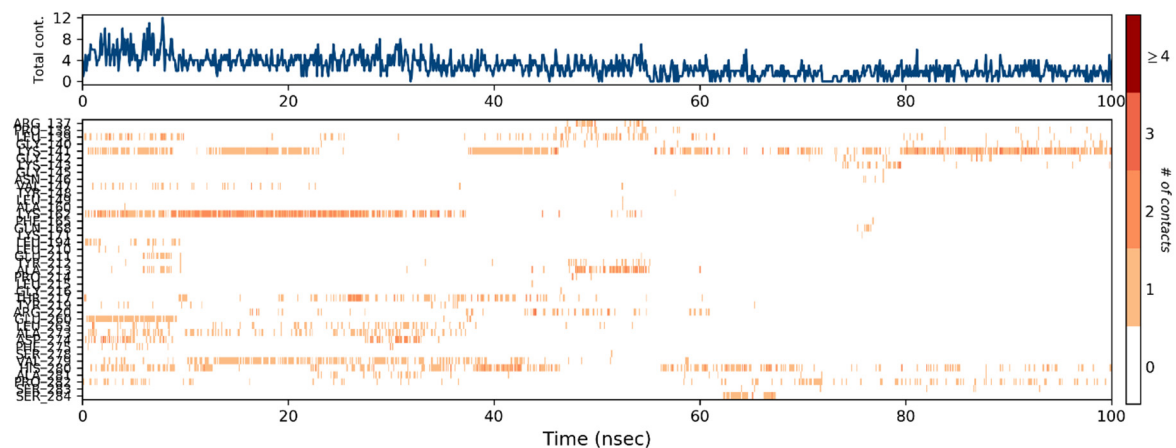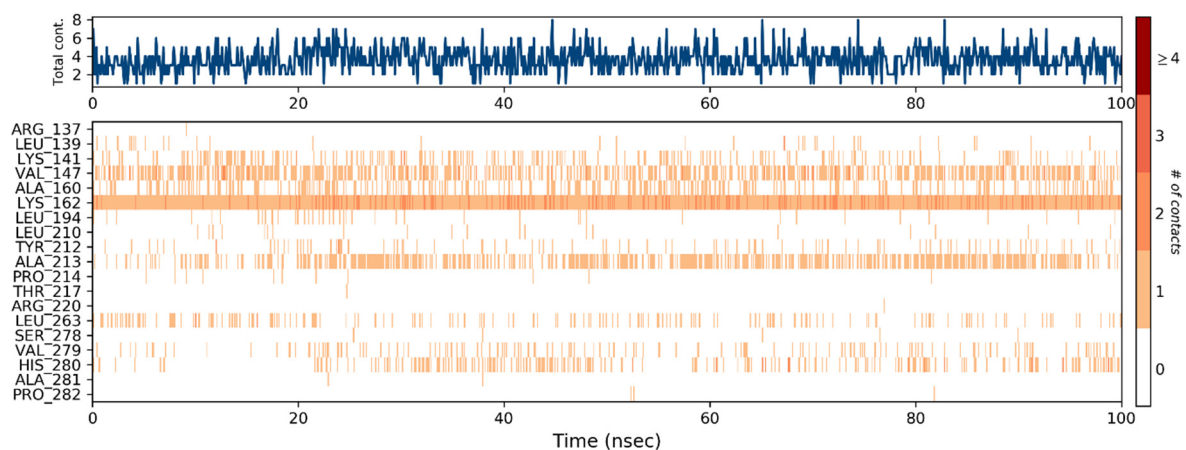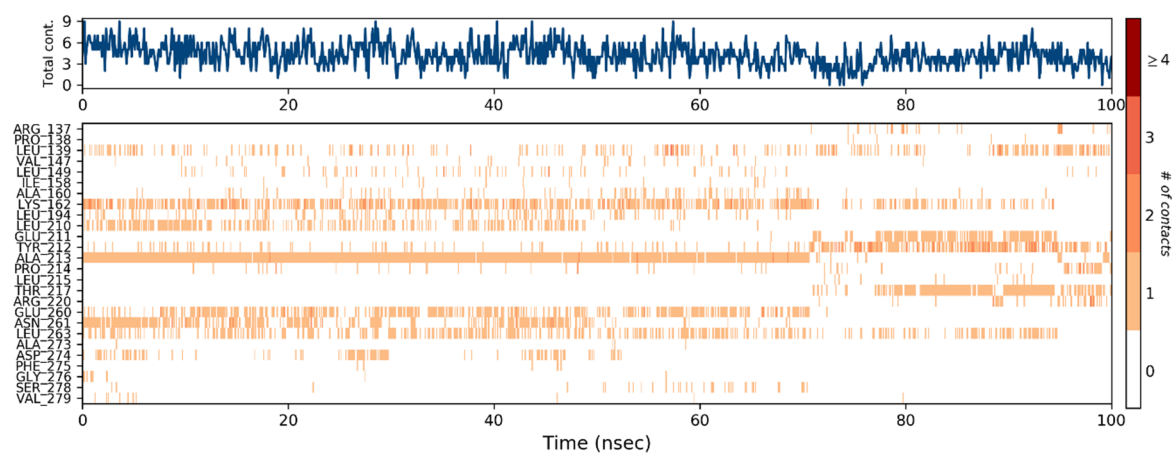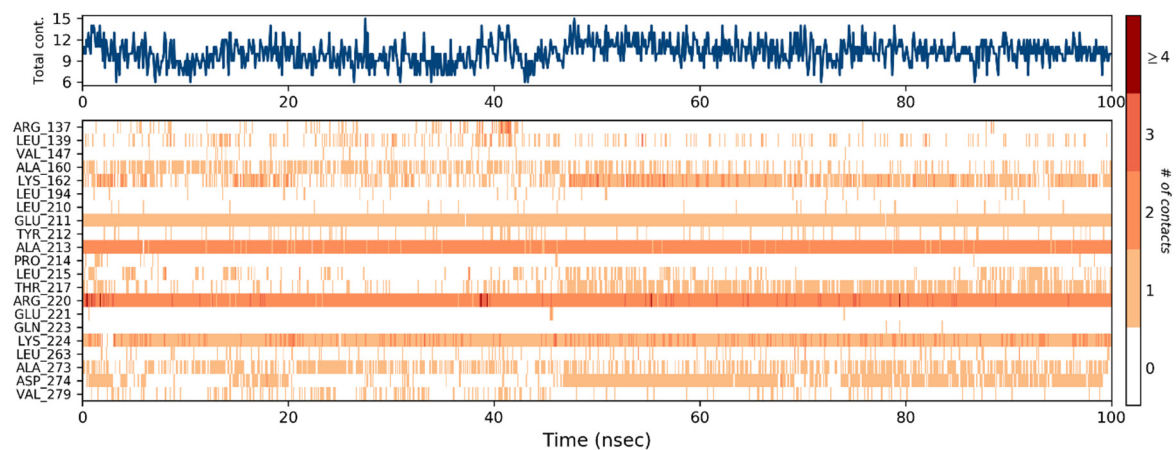

**Figure S8.** The average number of interactions (total-up, per specific residue-bottom) over the simulation time for Aurka. The subsequent figures present the complexes in the order: 1 (top), 2, 3, AZD1152 (bottom).
